# Supplementary material
Source: PubMed Central journal article supplement (PMC3381899)
Supplement: NIHMS371527-supplement-1.pdf [file NIHMS371527-supplement-1.pdf]

# Supplementary information

## Structure of mammalian poly (ADP-ribose) glycohydrolase reveals a flexible tyrosine clasp as a unique substrate-binding element

In-Kwon Kim, James R. Kiefer, Chris M. Ho, Roderick A. Stegeman, Scott Classen, John A. Tainer, and Tom Ellenberger

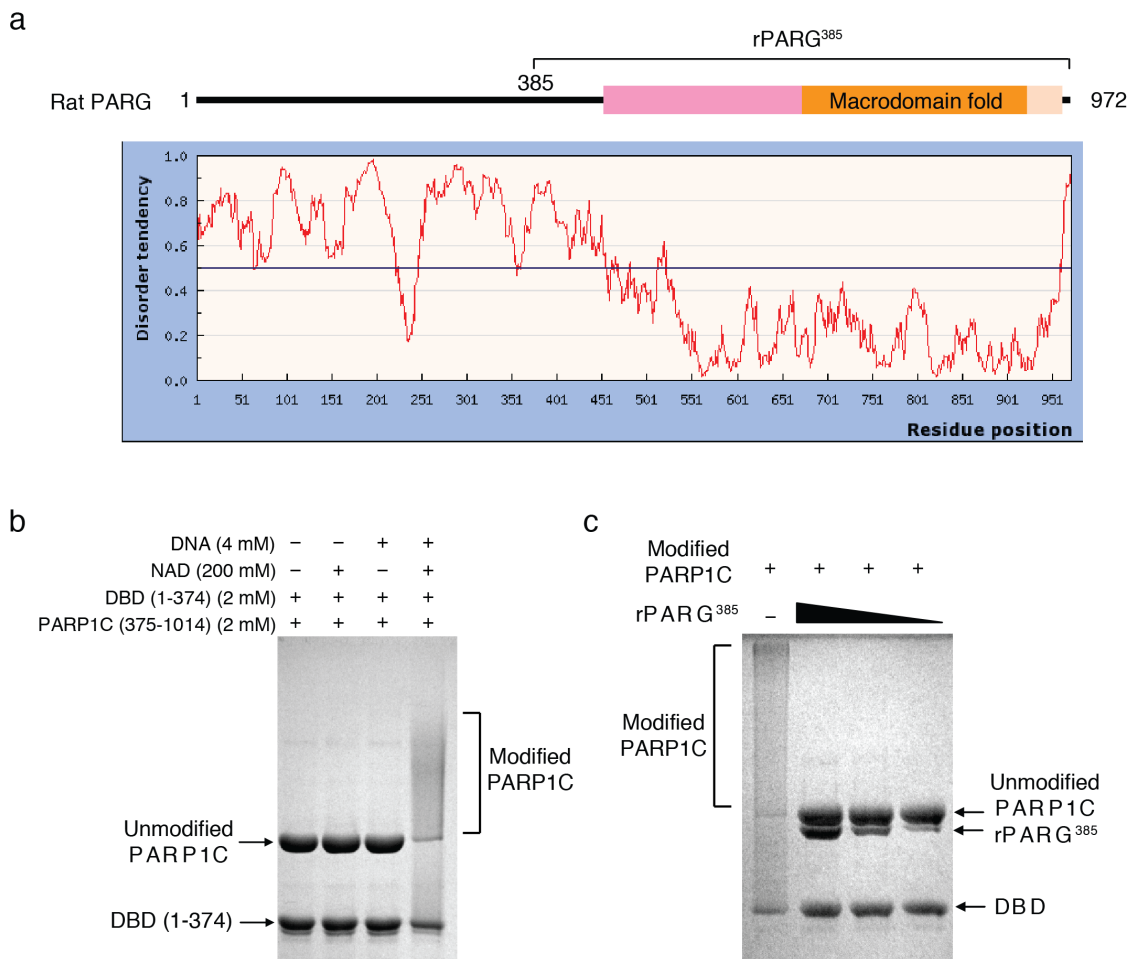

**Supplementary Figure 1** rPARG<sup>385</sup> is catalytically active. **(a)** The order-disorder prediction from IUPRED<sup>1</sup> indicates disorder in the N-terminal A-domain of PARG (residues 1–456)<sup>2</sup>, whereas the rPARG<sup>385</sup> protein that was crystallized (**Figure 1**) was predicted to be well-ordered. **(b)** PARP1 activation assay. A C-terminal fragment spanning the automodification, WGR, and catalytic domains of PARP1 (PARP1C, residues 375–1014) is automodified when incubated with the PARP1 DNA-binding domain (DBD, residues 1–374) and DNA in the presence of NAD<sup>+</sup>. The PARylated PARP1 protein runs as a smear on SDS-PAGE. **(c)** The crystallized rPARG<sup>385</sup> catalytic domain reverses the PARylation of PARP1, causing the protein to migrate as a discrete band on SDS-PAGE.

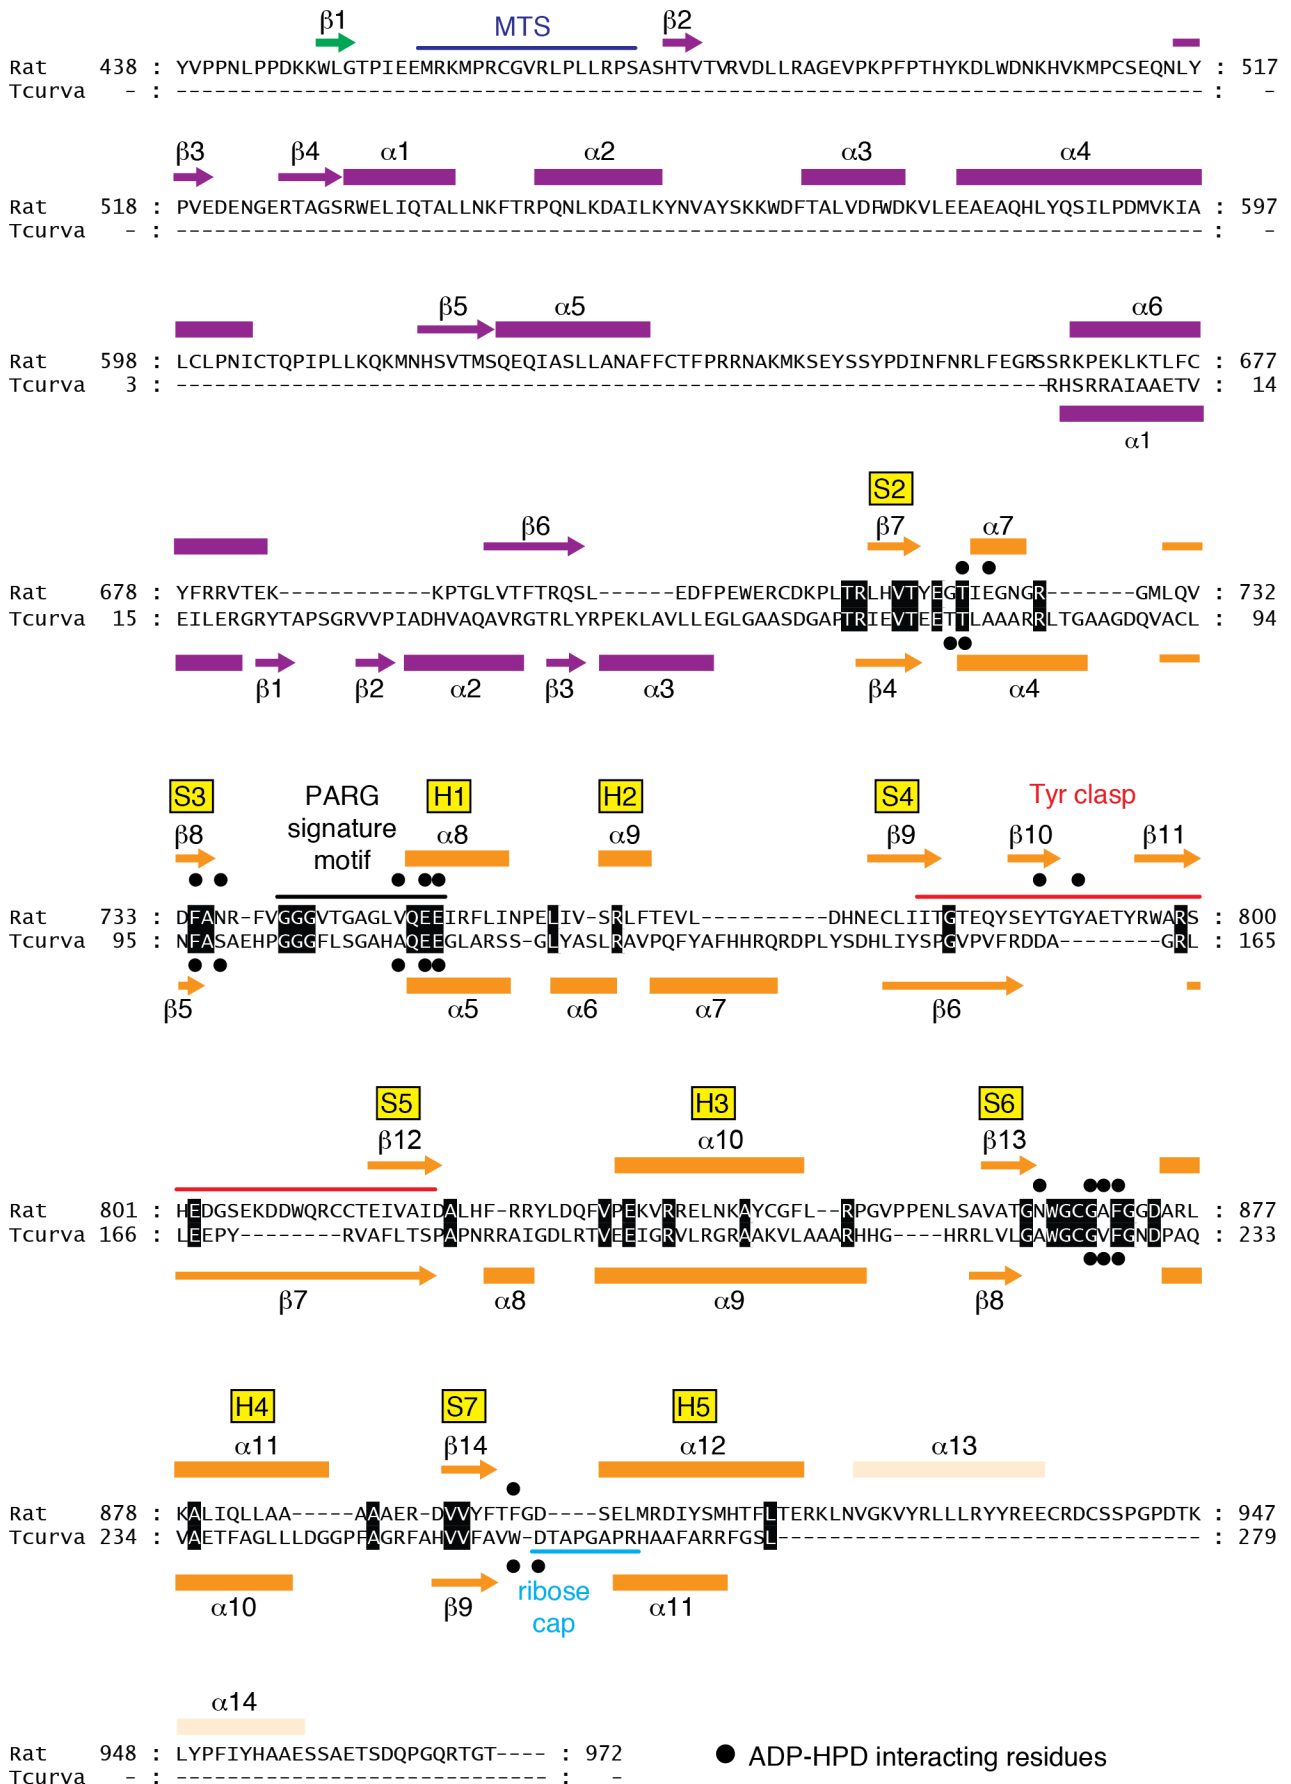

**Supplementary Figure 2** Structure-based alignment of rat PARG and *T. curvata* glycohydrolase. The conserved strands (S2, S3, etc.) and helices (H1, H2, etc.) of a canonical macro domain fold are shown with the sequences of rat PARG and *T. curvata* glycohydrolase aligned by superposition of the crystal structures. Residues in contact with the ADP-HPD ligand (•) are primarily located within the connecting segments joining strands S2, S3, S6, and S7 of the macro domain fold. A polypeptide segment in the *T. curvata* glycohydrolase, which we term the ribose cap (cyan), completely blocks the 2'-OH of the adenosine ribose and restricts its activity to exo-glycosidic cleavage of PAR polymers<sup>3</sup>.

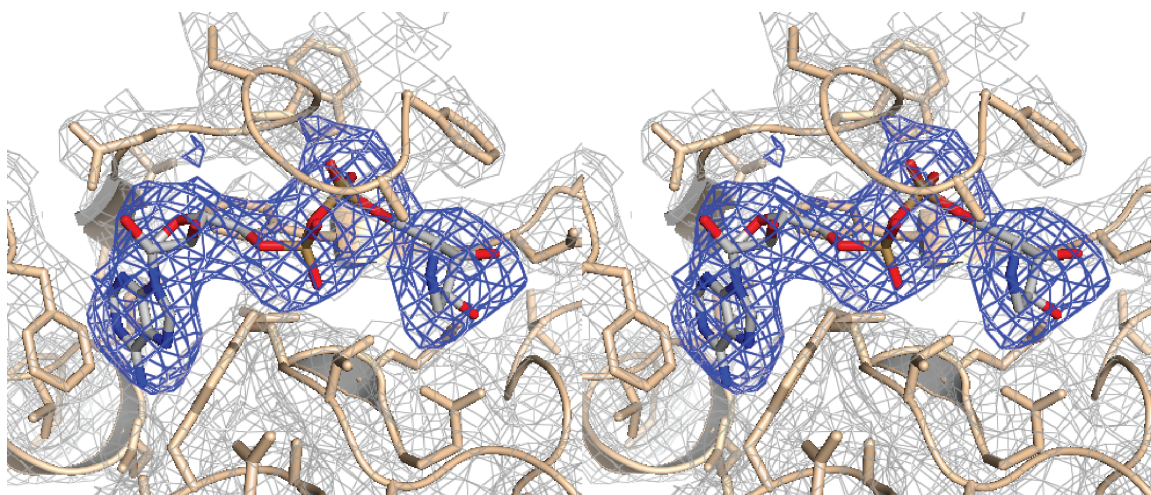

**Supplementary Figure 3** Stereo view of the electron density for the ADP-HPD ligand. Difference electron density map ( $F_o - F_c$ ) for the ADP-HPD contoured at  $3.0 \sigma$  (blue) is shown with  $2F_o - F_c$  electron density around the ligand (contoured at  $1.0 \sigma$ , grey). The ligand-bound rPARG<sup>385</sup> structure was solved by molecular replacement using the apo-rPARG<sup>385</sup> structure as a search model, and phases were calculated prior to the addition of ADP-HPD to the model. The orientation is similar to Figure 3b.

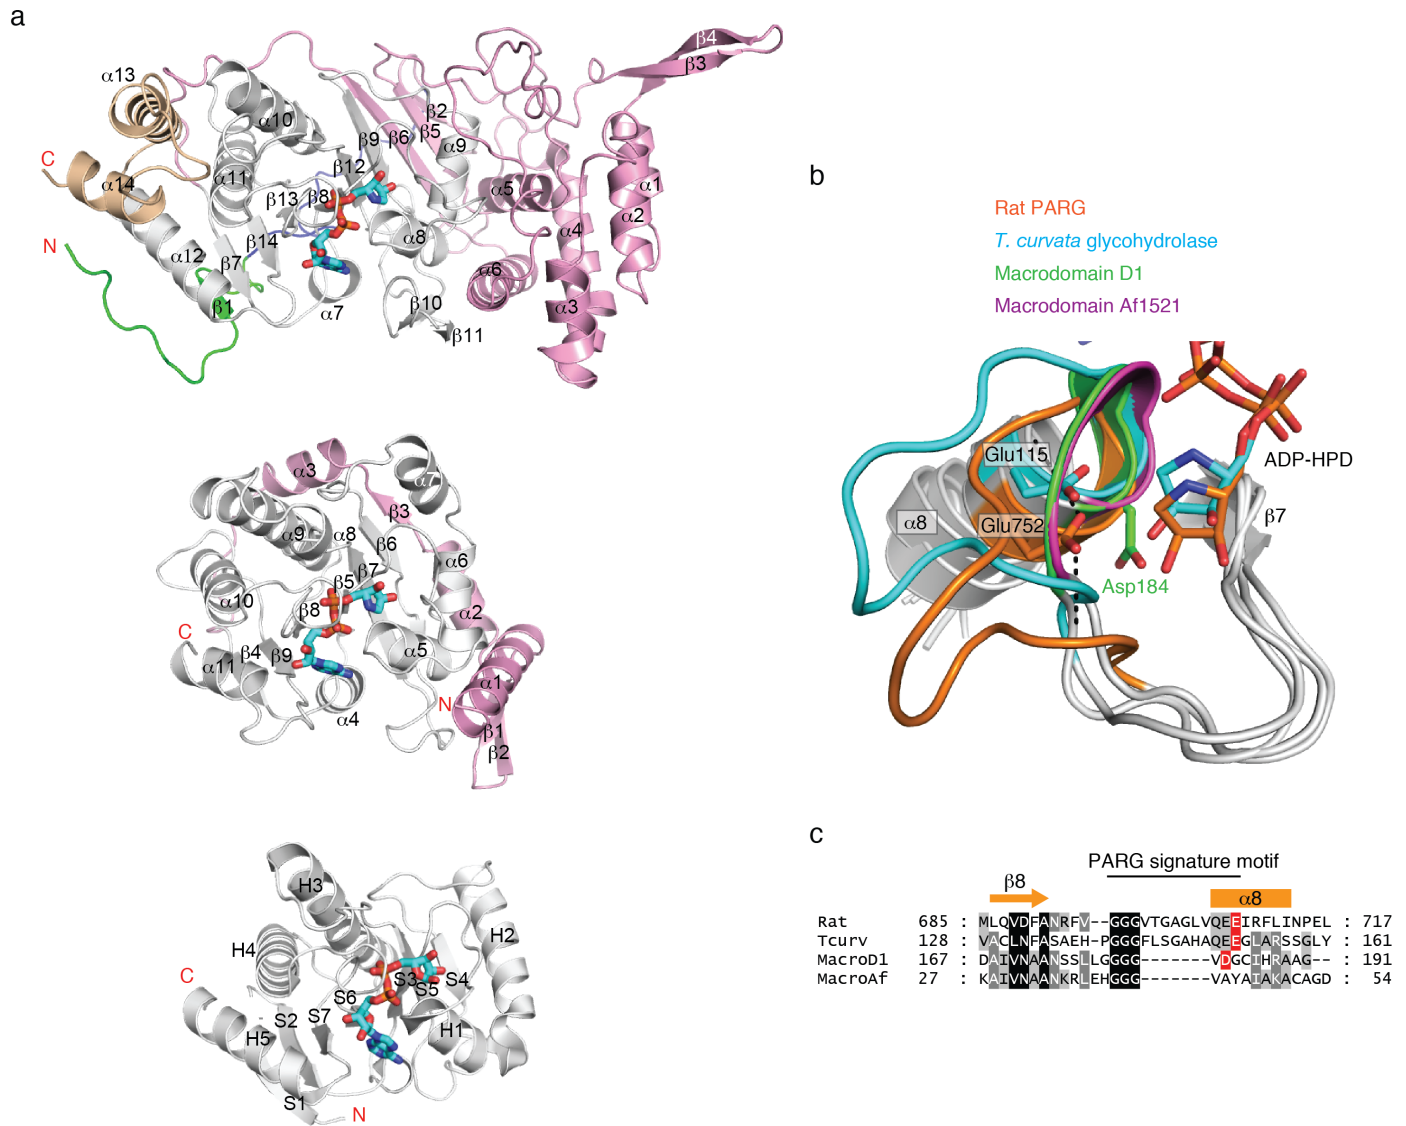

**Supplementary Figure 4** Structural comparisons of rat PARG, *T. curvata* glycohydrolase and other macrodomains. **(a)** Structural comparisons of (top) rPARG<sup>385</sup>, (middle) *T. curvata* glycohydrolase<sup>3</sup> (PDB accession 3SII), and (bottom) the macrodomain Af1521<sup>4</sup> (PDB accession 2BFQ) reveal the expanded structure of the PARG macro domain fold. Additional N-terminal (pink) and C-terminal (wheat) helical bundles pack against the conserved macrodomain core (white) of the rat PARG protein. The canonical secondary structural elements of the macrodomain are shown with alphanumeric labels in macrodomain Af1521 (bottom). The actual secondary structures assigned by DSSP<sup>5</sup> and labeled with Greek letter prefixes ( $\beta 7$ ,  $\alpha 7$ , etc.) are shown for rPARG<sup>385</sup> (top) and *T. curvata* glycohydrolase (middle). **(b-c)** Structural **(b)** and sequence **(c)** comparison of the glycine-rich loop of rat PARG (orange), *T. curvata* glycohydrolase<sup>3</sup> (cyan, PDB accession 3SII), macrodomain D1<sup>6</sup> (green, PDB accession 2X47) and macrodomain Af1521<sup>4</sup> (purple, PDB accession 2BFQ). Catalytic residues are shown as a stick in panel **(b)** and colored red in panel **(c)**. The PARG signature motif emanates from the glycine-rich loop and precisely orients the catalytic Glu752 residue towards C1' of ribose'' moiety. Hydrogen bonds that position the Glu752 side chain and involve neighboring mainchain nitrogen atoms from Gly742 and Val749 of PARG signature motif are shown as dashed lines.

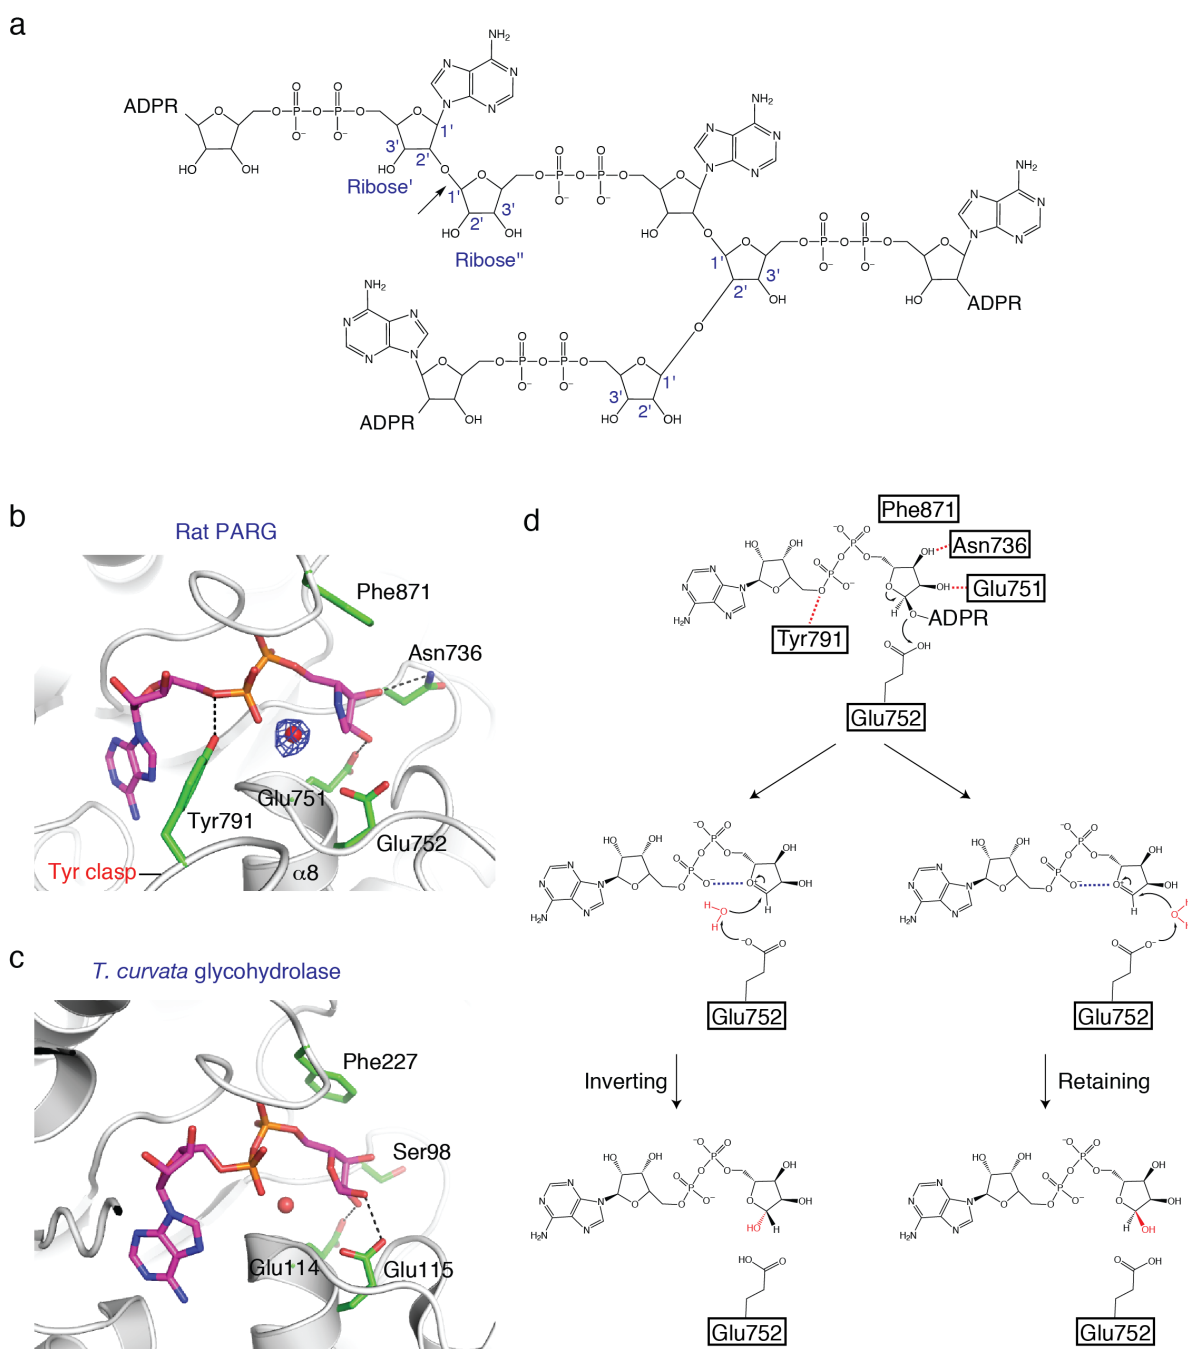

**Supplementary Figure 5** Proposed reaction scheme for mammalian PARG. **(a)** The poly(ADP-ribose) (PAR) substrate is a branched, repeating polymer of ADP-ribose units linked by  $\alpha(1''-2')$  O-glycosidic linkages with irregular branching via  $\alpha(1'''-2'')$  O-glycosidic linkages. PARG cleaves the  $\alpha(1''-2')$  O-glycosidic linkages (arrows), releasing oligo-(ADP-ribose) chains and ADP-ribose. **(b)** A bound water molecule located close to Glu752 in the unliganded rPARG<sup>385</sup> structure, is in a similar position as a bound water in the *T. curvata* glycohydrolase complexed to ADP-ribose<sup>3</sup> **(c)**. We have superimposed the ADP-HPD ligand from the 3.0 Å resolution complex structure onto the 1.95 Å structure of unliganded rPARG<sup>385</sup> showing the bound water. This water can serve as the nucleophile attacking the anomeric C1' of ribose'' as previously proposed<sup>3</sup>. The position of Glu752 with respect to the substrate analogue could support a water attack from either side of the ribose ring, generating either the ADP- $\alpha$ -ribose'' (retaining mechanism) or the ADP- $\beta$ -ribose'' (inverting mechanism) as shown in panel **(d)**.

**Supplementary Table 1** Crystallographic data statistics

|                                                     | apo rPARG <sup>385</sup> |               |                   | rPARG <sup>385</sup> -ADP-HPD complex |
|-----------------------------------------------------|--------------------------|---------------|-------------------|---------------------------------------|
| <b>Data collection</b>                              |                          |               |                   |                                       |
| Space group                                         | C222 <sub>1</sub>        |               |                   | C222 <sub>1</sub>                     |
| Cell dimensions                                     |                          |               |                   |                                       |
| <i>a</i> , <i>b</i> , <i>c</i> (Å)                  | 126.5, 199.5, 50.5       |               |                   | 130.8, 196.0, 163.5                   |
| $\alpha$ , $\beta$ , $\gamma$ (°)                   | 90.0, 90.0, 90.0         |               |                   | 90.0, 90.0, 90.0                      |
|                                                     | <i>Native</i>            | <i>Peak</i>   | <i>Inflection</i> |                                       |
| Wavelength                                          | 1.12712                  | 0.97954       | 0.97968           | 1.12712                               |
| Resolution (Å)                                      | 30–1.95                  | 30–2.25       | 30–2.25           | 30–3.0                                |
| <i>R</i> <sub>sym</sub> (%)                         | 5.7 (44.1)               | 6.7 (46.2)    | 6.5 (44.4)        | 5.5 (65.5)                            |
| <i>I</i> / $\sigma I$                               | 21.1 (1.7)               | 29.2 (3.9)    | 29.6 (4.0)        | 31.9 (3.7)                            |
| Completeness (%)                                    | 98.1 (83.4)              | 100.0 (100.0) | 100.0 (100.0)     | 90.1 (98.7)                           |
| Redundancy                                          | 6.2 (3.6)                | 7.6 (6.4)     | 7.6 (6.5)         | 8.8 (9.2)                             |
| <b>Refinement</b>                                   |                          |               |                   |                                       |
| Resolution (Å)                                      | 30–1.95                  |               |                   | 30–3.0                                |
| No. reflections                                     | 43903                    |               |                   | 35972                                 |
| <i>R</i> <sub>work</sub> / <i>R</i> <sub>free</sub> | 18.0 / 21.7              |               |                   | 24.6 / 27.4                           |
| No. atoms                                           |                          |               |                   |                                       |
| Protein                                             | 4,151                    |               |                   | 11,847                                |
| Ligand/ion                                          | –                        |               |                   | 105                                   |
| Water                                               | 203                      |               |                   | –                                     |
| <i>B</i> -factors                                   |                          |               |                   |                                       |
| Protein                                             | 32.1                     |               |                   | 49.7                                  |
| Ligand/ion                                          | –                        |               |                   | 78.4                                  |
| Water                                               | 38.2                     |               |                   | –                                     |
| R.m.s deviations                                    |                          |               |                   |                                       |
| Bond lengths (Å)                                    | 0.014                    |               |                   | 0.012                                 |
| Bond angles (°)                                     | 1.62                     |               |                   | 1.40                                  |

\*Values in parentheses are for highest-resolution shell.

Each dataset was collected from a single crystal.

## SUPPLEMENTARY REFERENCES

1. Dosztanyi, Z., Csizmok, V., Tompa, P. & Simon, I. IUPred: web server for the prediction of intrinsically unstructured regions of proteins based on estimated energy content. *Bioinformatics* **21**, 3433-4 (2005).
2. Patel, C.N., Koh, D.W., Jacobson, M.K. & Oliveira, M.A. Identification of three critical acidic residues of poly(ADP-ribose) glycohydrolase involved in catalysis: determining the PARG catalytic domain. *Biochem J* **388**, 493-500 (2005).
3. Slade, D. et al. The structure and catalytic mechanism of a poly(ADP-ribose) glycohydrolase. *Nature* **477**, 616-20 (2011).
4. Karras, G.I. et al. The macro domain is an ADP-ribose binding module. *EMBO J* **24**, 1911-20 (2005).
5. Kabsch, W. & Sander, C. Dictionary of protein secondary structure: pattern recognition of hydrogen-bonded and geometrical features. *Biopolymers* **22**, 2577-637 (1983).
6. Chen, D. et al. Identification of macrodomain proteins as novel O-acetyl-ADP-ribose deacetylases. *J Biol Chem* **286**, 13261-71 (2011).
